# Supplementary material for: Real-world experience of CPX-351 as first-line treatment for patients with acute myeloid leukemia
Source: PubMed Central journal article supplement (PMC8490353; doi:10.1038/s41408-021-00558-5), 2021-10-04

**Von:** Hövelmann, Julia <Julia.Hoevermann@uk-essen.de>  
**Gesendet:** Donnerstag, 16. September 2021 01:22  
**An:** Schroeder, Thomas <Thomas.Schroeder@uk-essen.de>  
**Betreff:** AW: CPX-351 Paper Bitte um kurzfristige Rückmeldung

Please request agreement from all authors including additions and deletions, these can be collected in the following way:  
Email your co-authors with the change, and ask them to reply to your email confirming that they agree to these changes. Once you have collected these replies, please combine all of the co-authors' email responses in one document and upload this file to your submission.

Agreed.

Herzliche Grüße,

Julia Hövelmann

Dr. med. Julia Hövelmann  
Assistenzärztin  
Klinik für Hämatologie und Stammzelltransplantation  
Universitätsklinikum Essen

---

Please request agreement from all authors including additions and deletions, these can be collected in the following way:  
Email your co-authors with the change, and ask them to reply to your email confirming that they agree to these changes. Once you have collected these replies, please combine all of the co-authors' email responses in one document and upload this file to your submission.

Agreed!

Best regards

Prof. Dr. med. Ulrich Kaiser  
Med. Klinik II  
St. Bernward Krankenhaus  
Treibestraße 9  
31134 Hildesheim  
Telefon: 0 51 21 / 90 12 74  
Telefax: 0 51 21 / 90 12 82  
Email: [med2@bernward-khs.de](mailto:med2@bernward-khs.de)  
Homepage: [www.bernward-khs.de](http://www.bernward-khs.de)

---

**Von:** Henning, Lea <[Lea.Henning@uk-essen.de](mailto:Lea.Henning@uk-essen.de)>  
**Gesendet:** Samstag, 11. September 2021 13:38

**An:** Alakel, Nael; Schroeder, Thomas; 'Kobbe@med.uni-duesseldorf.de'; Hanoun, Maher; 'Germing@med.uni-duesseldorf.de'; 'Haas@med.uni-duesseldorf.de'; 'Matthias.Stelljes@ukmuenster.de'; 'lauseker@ibe.med.uni-muenchen.de'; Schetelig, Johannes; Bornhäuser, Martin; 'Christoph.Schliemann@ukmuenster.de'; 'tim.sauer@med.uni-heidelberg.de'; 'heuser.michael@mh-hannover.de'; 'Döhner Hartmut'; 'Gaidzik Verena'; 'thol.felicitas@mh-hannover.de'; 'tobias.holderried@ukbonn.de'; 'eva.wagner@unimedizin-mainz.de'; 'oliver.kriege@unimedizin-mainz.de'; 'katharina.goetze@mri.tum.de'; 'mareike.verbeek@mri.tum.de'; 'a.morgner@skc.de'; 'Döhner Konstanze'; 'uwe.platzbecker@medizin.uni-leipzig.de'; 'Vladan'; Sockel, Katja; 'william.krueger@uni-greifswald.de'; 'stefan.krause@uk-erlangen.de'; 'udo.holtick@uk-koeln.de'; 'Kerstin.Schaefer-Eckart@klinikum-nuernberg.de'; 'Josephine.Schroeder@helios-gesundheit.de'; 'innere4@uk-halle.de'; 'Lars.Fransecky@uksh.de'; 'kmt-anfrage@ukw.de'; HIBK-Sekretariat Med2; 'charlotte.neuerburg@ukbonn.de'; 'Sebastian.Scholl@med.uni-jena.de'; 'c.jehn@asklepios.com'; 'nadine.scheer-wiaczka@gk.de'; 'jens.chemnitz@gk.de'; 'm.haenel@skc.de'; 'julia.unglaub@med.uni-heidelberg.de'

**Cc:** Rautenberg, Christina; Stölzel, Friedrich; Middeke, Jan Moritz

**Betreff:** [EXTERN] AW: CPX-351 Paper Bitte um kurzfristige Rückmeldung

Please request agreement from all authors including additions and deletions, these can be collected in the following way:

Email your co-authors with the change, and ask them to reply to your email confirming that they agree to these changes. Once you have collected these replies, please combine all of the co-authors' email responses in one document and upload this file to your submission.

Agreed.  
Viele Grüße,  
Lea Henning

---

Von: Alakel, Nael [Nael.Alakel@uniklinikum-dresden.de]

Gesendet: Freitag, 10. September 2021 07:51

An: Schroeder, Thomas; 'Kobbe@med.uni-duesseldorf.de'; Hanoun, Maher; 'Germing@med.uni-duesseldorf.de'; 'Haas@med.uni-duesseldorf.de'; 'Matthias.Stelljes@ukmuenster.de'; 'lauseker@ibe.med.uni-muenchen.de'; Schetelig, Johannes; Bornhäuser, Martin; 'Christoph.Schliemann@ukmuenster.de'; 'tim.sauer@med.uni-heidelberg.de'; 'heuser.michael@mh-hannover.de'; 'Döhner Hartmut'; 'Gaidzik Verena'; 'thol.felicitas@mh-hannover.de'; 'tobias.holderried@ukbonn.de'; 'eva.wagner@unimedizin-mainz.de'; 'oliver.kriege@unimedizin-mainz.de'; 'katharina.goetze@mri.tum.de'; 'mareike.verbeek@mri.tum.de'; 'a.morgner@skc.de'; 'Döhner Konstanze'; 'uwe.platzbecker@medizin.uni-leipzig.de'; 'Vladan'; Sockel, Katja; 'william.krueger@uni-greifswald.de'; 'stefan.krause@uk-erlangen.de'; 'udo.holtick@uk-koeln.de'; 'Kerstin.Schaefer-Eckart@klinikum-nuernberg.de'; 'Josephine.Schroeder@helios-gesundheit.de'; 'innere4@uk-halle.de'; 'Lars.Fransecky@uksh.de'; 'kmt-anfrage@ukw.de'; 'med2@bernward-khs.de'; 'charlotte.neuerburg@ukbonn.de'; 'Sebastian.Scholl@med.uni-jena.de'; 'c.jehn@asklepios.com'; 'nadine.scheer-wiaczka@gk.de'; 'jens.chemnitz@gk.de'; 'm.haenel@skc.de'; 'julia.unglaub@med.uni-heidelberg.de'; 'Germing@med.uni-duesseldorf.de'; 'Matthias.Stelljes@ukmuenster.de'; Henning, Lea  
Cc: Rautenberg, Christina; Stölzel, Friedrich; Middeke, Jan Moritz  
Betreff: AW: CPX-351 Paper Bitte um kurzfristige Rückmeldung

Please request agreement from all authors including additions and deletions, these can be collected in the following way:

Email your co-authors with the change, and ask them to reply to your email confirming that they agree to these changes. Once you have collected these replies, please combine all of the co-authors' email responses in one document and upload this file to your submission.

Agreed

Best regards  
Nael Alakel

Dr.med. Nael Alakel  
Funktionsoberarzt  
Medizinischen Klinik und Poliklinik I.  
Tel. +49 (0)351 458-2321  
Fax +49 (0)351 458-5344

Universitätsklinikum Carl Gustav Carus  
an der Technischen Universität Dresden  
Anstalt des öffentlichen Rechts des Freistaates Sachsen  
Fetscherstraße 74, 01307 Dresden  
[www.uniklinikum-dresden.de](http://www.uniklinikum-dresden.de)<<http://www.uniklinikum-dresden.de>>  
Vorstand: Prof. Dr. med. D. Michael Albrecht (Sprecher), Frank Ohi  
Vorsitzender des Aufsichtsrates: Univ.-Doz. Dr. G. Brunner  
USt.-IDNr.: DE 140 135 217, St.-Nr.: 203 145 03113

**Von:** PD Dr. Michael Lauseker <lauseker@ibe.med.uni-muenchen.de>

**Gesendet:** Mittwoch, 15. September 2021 09:49

**An:** Schroeder, Thomas <Thomas.Schroeder@uk-essen.de>

**Betreff:** Re: CPX-351 Paper Bitte um kurzfristige Rückmeldung

Please request agreement from all authors including additions and deletions, these can be collected in the following way:

Email your co-authors with the change, and ask them to reply to your email confirming that they agree to these changes. Once you have collected these replies, please combine all of the co-authors' email responses in one document and upload this file to your submission.

Agreed

Lieber Herr Schroeder,  
sorry für die späte Rückmeldung, ich war im Urlaub. Von meiner Seite gibt es natürlich keine Bedenken.

Gratulation zur Annahme!

Viele Grüße

Michael Lauseker

**Von:** Lars.Fransecky@uksh.de <Lars.Fransecky@uksh.de>

**Gesendet:** Montag, 13. September 2021 07:16

**An:** Schroeder, Thomas <Thomas.Schroeder@uk-essen.de>

**Betreff:** AW: CPX-351 Paper Bitte um kurzfristige Rückmeldung

Please request agreement from all authors including additions and deletions, these can be collected in the following way:

Email your co-authors with the change, and ask them to reply to your email confirming that they agree to these changes. Once you have collected these replies, please combine all of the co-authors' email responses in one document and upload this file to your submission.

Agreed!

**Von:** Schetelig, Johannes <Johannes.Schetelig@uniklinikum-dresden.de>  
**Gesendet:** Samstag, 11. September 2021 11:32  
**An:** Schroeder, Thomas <Thomas.Schroeder@uk-essen.de>  
**Betreff:** Re: CPX-351 Paper Bitte um kurzfristige Rückmeldung

Please request agreement from all authors including additions and deletions, these can be collected in the following way:  
Email your co-authors with the change, and ask them to reply to your email confirming that they agree to these changes. Once you have collected these replies, please combine all of the co-authors' email responses in one document and upload this file to your submission.

Agreed. Best, Johannes

**Von:** William Krüger <william.krueger@uni-greifswald.de>  
**Gesendet:** Freitag, 10. September 2021 14:09  
**An:** Schroeder, Thomas <Thomas.Schroeder@uk-essen.de>  
**Betreff:** AW: CPX-351 Paper Bitte um kurzfristige Rückmeldung

Please request agreement from all authors including additions and deletions, these can be collected in the following way:  
Email your co-authors with the change, and ask them to reply to your email confirming that they agree to these changes. Once you have collected these replies, please combine all of the co-authors' email responses in one document and upload this file to your submission.

Agreed!

Best regards, William Krüger

(Meine erstes ‚agreed‘ kam z. T. zurück)

-----Ursprüngliche Nachricht-----

**Von:** Charlotte.Neuerburg@ukbonn.de <Charlotte.Neuerburg@ukbonn.de>  
**Gesendet:** Freitag, 10. September 2021 13:41  
**An:** Schroeder, Thomas <Thomas.Schroeder@uk-essen.de>  
**Betreff:** Antwort: CPX-351 Paper Bitte um kurzfristige Rückmeldung

Please request agreement from all authors including additions and deletions, these can be collected in the following way:  
Email your co-authors with the change, and ask them to reply to your email confirming that they agree to these changes. Once you have collected these replies, please combine all of the co-authors' email responses in one document and upload this file to your submission.

Agreed

Dr. med. Charlotte Neuerburg  
Assistenzärztin  
Medizinische Klinik und Poliklinik III  
Innere Medizin mit den Schwerpunkten  
Onkologie, Hämatologie und Rheumatologie Sigmund-Freud-Str. 25  
53127 Bonn

**Von:** jehn christian <cjeahn2016@gmail.com>  
**Gesendet:** Freitag, 10. September 2021 12:39  
**An:** Schroeder, Thomas <Thomas.Schroeder@uk-essen.de>  
**Betreff:** Re: [EXTERN] CPX-351 Paper Bitte um kurzfristige Rückmeldung  
**Priorität:** Hoch

Please request agreement from all authors including additions and deletions, these can be collected in the following way:  
Email your co-authors with the change, and ask them to reply to your email confirming that they agree to these changes. Once you have collected these replies, please combine all of the co-authors' email responses in one document and upload this file to your submission.

Agreed!

Viele Grüße

Christian Jehn

**Von:** Platzbecker, Uwe <Uwe.Platzbecker@medizin.uni-leipzig.de>  
**Gesendet:** Freitag, 10. September 2021 11:08  
**An:** Schroeder, Thomas <Thomas.Schroeder@uk-essen.de>  
**Betreff:** WG: [Extern] - CPX-351 Paper Bitte um kurzfristige Rückmeldung

Please request agreement from all authors including additions and deletions, these can be collected in the following way:  
Email your co-authors with the change, and ask them to reply to your email confirming that they agree to these changes. Once you have collected these replies, please combine all of the co-authors' email responses in one document and upload this file to your submission.

ok

HG  
U. Platzbecker

**Von:** Wagner, Eva-Maria <Eva.Wagner@unimedizin-mainz.de>  
**Gesendet:** Freitag, 10. September 2021 11:01  
**An:** Schroeder, Thomas <Thomas.Schroeder@uk-essen.de>  
**Betreff:** AW: CPX-351 Paper Bitte um kurzfristige Rückmeldung

Please request agreement from all authors including additions and deletions, these can be collected in the following way:

Email your co-authors with the change, and ask them to reply to your email confirming that they agree to these changes. Once you have collected these replies, please combine all of the co-authors' email responses in one document and upload this file to your submission.

Dear Thomas,  
I agree.

Kind regards

Eva

**Dr. Eva Maria Wagner-Drouet**  
Leitung Stammzelltransplantation und zelluläre Immuntherapie  
Hämatologie, internistische Onkologie und Pneumologie  
3. Medizinische Klinik und Poliklinik  
UCT der Universitätsmedizin Mainz  
Tel: 06131-17-2712  
Fax: 06131-17-472712

**Sekretariat:**  
Frau I. Schmidt  
Tel: 06131-17-5051  
Mail: [inge.schmidt@unimedizin-mainz.de](mailto:inge.schmidt@unimedizin-mainz.de)

**Von:** Kobbe@med.uni-duesseldorf.de <Kobbe@med.uni-duesseldorf.de>

**Gesendet:** Freitag, 10. September 2021 10:41

**An:** Schroeder, Thomas <Thomas.Schroeder@uk-essen.de>; Hanoun, Maher <Maher.Hanoun@uk-essen.de>; Germing@med.uni-duesseldorf.de; Haas@med.uni-duesseldorf.de; Matthias.Stelljes@ukmuenster.de; lauseker@ibe.med.uni-muenchen.de; Johannes.Schetelig@uniklinikum-dresden.de; martin.bornhaeuser@uniklinikum-dresden.de; Christoph.Schliemann@ukmuenster.de; tim.sauer@med.uni-heidelberg.de; heuser.michael@mh-hannover.de; Hartmut.Doehner@uniklinik-ulm.de; Verena.Gaidzik@uniklinik-ulm.de; thol.felicitas@mh-hannover.de; tobias.holderried@ukbonn.de; eva.wagner@unimedizin-mainz.de; oliver.kriege@unimedizin-mainz.de; katharina.goetze@mri.tum.de; mareike.verbeek@mri.tum.de; a.morgner@skc.de; Konstanze.Doehner@uniklinik-ulm.de; uwe.platzbecker@medizin.uni-leipzig.de; Vucinic@medizin.uni-leipzig.de; nael.alakel@uniklinikum-dresden.de; katja.sockel@ukdd.de; william.krueger@uni-greifswald.de; stefan.krause@uk-erlangen.de; udo.holtick@uk-koeln.de; Kerstin.Schaefer-Eckart@klinikum-nuernberg.de; Josephine.Schroeder@helios-gesundheit.de; innere4@uk-halle.de; Lars.Fransecky@uksh.de; kmt-anfrage@ukw.de; med2@bernward-khs.de; charlotte.neuerburg@ukbonn.de; Sebastian.Scholl@med.uni-jena.de; c.jehn@asklepios.com; nadine.scheer-wiaczka@gk.de; jens.chemnitz@gk.de; m.haenel@skc.de; julia.unglaub@med.uni-heidelberg.de; Germing@med.uni-duesseldorf.de; Matthias.Stelljes@ukmuenster.de; Henning, Lea <Lea.Henning@uk-essen.de>

**Cc:** Rautenberg, Christina <Christina.Rautenberg@uk-essen.de>; Friedrich.Stoelzel@uniklinikum-dresden.de; JanMoritz.Middeke@uniklinikum-dresden.de

**Betreff:** AW: [Extern] - CPX-351 Paper Bitte um kurzfristige Rückmeldung

Please request agreement from all authors including additions and deletions, these can be collected in the following way:

Email your co-authors with the change, and ask them to reply to your email confirming that they agree to these changes. Once you have collected these replies, please combine all of the co-authors' email responses in one document and upload this file to your submission.

Agreed, best GK

*Professor Dr. med. Guido Kobbe  
Oberarzt und Leiter der Stammzelltransplantation  
Klinik für Hämatologie, Onkologie und Klinische Immunologie*

**Universitätsklinikum Düsseldorf**

Gebäude 11.64  
Moorenstr. 5  
40225 Düsseldorf

Tel: +49 211 81-16826  
Fax: +49 211 81-17959  
e-Mail: [kobbe@med.uni-duesseldorf.de](mailto:kobbe@med.uni-duesseldorf.de)  
Internet: [www.uniklinik-duesseldorf.de](http://www.uniklinik-duesseldorf.de)

Universitätsklinikum Düsseldorf (UKD) - Anstalt des öffentlichen Rechts  
Moorenstraße 5 | 40225 Düsseldorf | Telefon: +49 211 81-00 | Telefax: +49 211 81-04855  
Internet: [www.uniklinik-duesseldorf.de](http://www.uniklinik-duesseldorf.de) | E-Mail: [info@uniklinik-duesseldorf.de](mailto:info@uniklinik-duesseldorf.de)

Kommissarische Aufsichtsratsvorsitzende: Prof. Dr. Anja Steinbeck  
Vorstand: Prof. Dr. Dr. Frank Schneider (Ärztlicher Direktor, Vorstandsvorsitzender) | Ekkehard Zimmer (Kaufmännischer Direktor, Stv. Vorstandsvorsitzender) | Prof. Dr. Nikolaj Klöcker (Dekan der Medizinischen Fakultät) | Torsten Rantzsch (Pflegedirektor) | Prof. Dr. Benedikt Pannen (Stv. Ärztlicher Direktor)

Steuernummer: 106-5773-0045 | IK: 26051 00 18  
Bankverbindung: Stadtparkasse Düsseldorf | BIC: DUSSEDDXXX | IBAN: DE 94 3005 0110 0010 001550

**Von:** Konstanze.Doehner@uniklinik-uhl.de <Konstanze.Doehner@uniklinik-uhl.de>

**Gesendet:** Freitag, 10. September 2021 09:23

**An:** Schroeder, Thomas <Thomas.Schroeder@uk-essen.de>; Kobbe@med.uni-duesseldorf.de; Hanoun, Maher <Maher.Hanoun@uk-essen.de>; Germing@med.uni-duesseldorf.de; Haas@med.uni-duesseldorf.de; Matthias.Stelljes@ukmuenster.de; lauseker@ibe.med.uni-muenchen.de; Johannes.Schetelig@uniklinikum-dresden.de; martin.bornhaeuser@uniklinikum-dresden.de; Christoph.Schliemann@ukmuenster.de; tim.sauer@med.uni-heidelberg.de; heuser.michael@mh-hannover.de; Hartmut.Doehner@uniklinik-uhl.de; Verena.Gaidzik@uniklinik-uhl.de; thol.felicitas@mh-hannover.de; tobias.holderried@ukbonn.de; eva.wagner@unimedizin-mainz.de; oliver.kriege@unimedizin-mainz.de; katharina.goetze@mri.tum.de; mareike.verbeek@mri.tum.de; a.morgner@skc.de; uwe.platzbecker@medizin.uni-leipzig.de; Vucinic@medizin.uni-leipzig.de; nael.alakel@uniklinikum-dresden.de; katja.sockel@ukdd.de; william.krueger@uni-greifswald.de; stefan.krause@uk-erlangen.de; udo.holtick@uk-koeln.de; Kerstin.Schaefer-Eckart@klinikum-nuernberg.de; Josephine.Schroeder@helios-gesundheit.de; innere4@uk-halle.de; Lars.Fransecky@uksh.de; kmt-anfrage@ukw.de; med2@bernward-khs.de; charlotte.neuerburg@ukbonn.de; Sebastian.Scholl@med.uni-jena.de; c.jehn@asklepios.com; nadine.scheer-wiaczka@gk.de; jens.chemnitz@gk.de; m.haenel@skc.de; julia.unglaub@med.uni-heidelberg.de; Germing@med.uni-duesseldorf.de; Matthias.Stelljes@ukmuenster.de; Henning, Lea <Lea.Henning@uk-essen.de>

**Cc:** Rautenberg, Christina <Christina.Rautenberg@uk-essen.de>; Friedrich.Stoelzel@uniklinikum-dresden.de; JanMoritz.Middeke@uniklinikum-dresden.de

**Betreff:** AW: CPX-351 Paper Bitte um kurzfristige Rückmeldung

Please request agreement from all authors including additions and deletions, these can be collected in the following way:

Email your co-authors with the change, and ask them to reply to your email confirming that

they agree to these changes. Once you have collected these replies, please combine all of the co-authors' email responses in one document and upload this file to your submission.

Agreed!  
Konstanze Döhner

Prof. Dr. Konstanze Döhner  
University Hospital of Ulm  
Department of Internal Medicine III  
Albert-Einstein-Allee 23  
89081 Ulm  
Germany  
Phone: +49-731-50045543  
FAX: +49-731-50045505  
email: [konstanze.doehner@uniklinik-ulm.de](mailto:konstanze.doehner@uniklinik-ulm.de)

**Von:** Thol.Felicitas@mh-hannover.de <Thol.Felicitas@mh-hannover.de>  
**Gesendet:** Freitag, 10. September 2021 09:17  
**An:** Schroeder, Thomas <Thomas.Schroeder@uk-essen.de>  
**Betreff:** AW: CPX-351 Paper Bitte um kurzfristige Rückmeldung

Please request agreement from all authors including additions and deletions, these can be collected in the following way:  
Email your co-authors with the change, and ask them to reply to your email confirming that they agree to these changes. Once you have collected these replies, please combine all of the co-authors' email responses in one document and upload this file to your submission.

Lieber Thomas,  
Agreed.  
Viele Grüße  
Felicitas

**Von:** Sauer, Tim <Tim.Sauer@med.uni-heidelberg.de>  
**Gesendet:** Freitag, 10. September 2021 09:15  
**An:** Schroeder, Thomas <Thomas.Schroeder@uk-essen.de>  
**Betreff:** AW: CPX-351 Paper Bitte um kurzfristige Rückmeldung  
Please request agreement from all authors including additions and deletions, these can be collected in the following way:  
Email your co-authors with the change, and ask them to reply to your email confirming that they agree to these changes. Once you have collected these replies, please combine all of the co-authors' email responses in one document and upload this file to your submission.

Agreed.

Best regards,

Tim Sauer



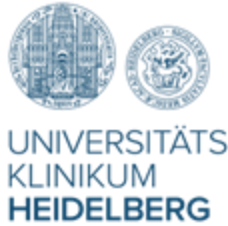

**Dr. med. Tim Sauer**

Oberarzt | Taskforce-Leiter Akute myeloische Leukämie (AML)  
und myeloproliferative Neoplasien (MPN)  
Medizinische Klinik (Kreihl-Klinik) | Zentrum für Innere Medizin  
Klinik für Hämatologie, Onkologie und Rheumatologie | Innere Medizin V

Universitätsklinikum Heidelberg | Im Neuenheimer Feld 410 | 69120 Heidelberg  
Tel.: +49 6221 56-38010 | Fax: +49 6221 56-5435 | E-Mail: [tim.sauer@med.uni-heidelberg.de](mailto:tim.sauer@med.uni-heidelberg.de) <http://www.klinikum.uni-heidelberg.de>

**Von:** Hartmut.Doehner@uniklinik-ulm.de <Hartmut.Doehner@uniklinik-ulm.de>

**Gesendet:** Freitag, 10. September 2021 09:04

**An:** Schroeder, Thomas <Thomas.Schroeder@uk-essen.de>

**Betreff:** AW: CPX-351 Paper Bitte um kurzfristige Rückmeldung

Please request agreement from all authors including additions and deletions, these can be collected in the following way:

Email your co-authors with the change, and ask them to reply to your email confirming that they agree to these changes. Once you have collected these replies, please combine all of the co-authors' email responses in one document and upload this file to your submission.

Agreed.

Viele Grüße, Hartmut Döhner

**Von:** Morgner, Anke OÄ Dr. med. <a.morgner@skc.de>

**Gesendet:** Freitag, 10. September 2021 08:39

**An:** Schroeder, Thomas <Thomas.Schroeder@uk-essen.de>

**Betreff:** AW: CPX-351 Paper Bitte um kurzfristige Rückmeldung

Please request agreement from all authors including additions and deletions, these can be collected in the following way:

Email your co-authors with the change, and ask them to reply to your email confirming that they agree to these changes. Once you have collected these replies, please combine all of the co-authors' email responses in one document and upload this file to your submission.

Agreed

Best regards.

A.morgner

**Von:** Scholl, Sebastian <Sebastian.Scholl@med.uni-jena.de>

**Gesendet:** Freitag, 10. September 2021 08:30

**An:** Schroeder, Thomas <Thomas.Schroeder@uk-essen.de>

**Betreff:** AW: CPX-351 Paper Bitte um kurzfristige Rückmeldung

Please request agreement from all authors including additions and deletions, these can be collected in the following way:

Email your co-authors with the change, and ask them to reply to your email confirming that they agree to these changes. Once you have collected these replies, please combine all of the co-authors' email responses in one document and upload this file to your submission.

„Agreed“

Herzlichen Dank und viele Grüße  
Sebastian Scholl

**Von:** Haas@med.uni-duesseldorf.de <Haas@med.uni-duesseldorf.de>

**Gesendet:** Freitag, 10. September 2021 08:29

**An:** Mareike.Verbeek@mri.tum.de; Schroeder, Thomas <Thomas.Schroeder@uk-essen.de>; Kobbe@med.uni-duesseldorf.de; Hanoun, Maher <Maher.Hanoun@uk-essen.de>; Germing@med.uni-duesseldorf.de; Matthias.Stelljes@ukmuenster.de; lauseker@ibe.med.uni-muenchen.de; Johannes.Schetelig@uniklinikum-dresden.de; martin.bornhaeuser@uniklinikum-dresden.de; Christoph.Schliemann@ukmuenster.de; tim.sauer@med.uni-heidelberg.de; heuser.michael@mh-hannover.de; Hartmut.Doehner@uniklinik-ulm.de; Verena.Gaidzik@uniklinik-ulm.de; thol.felicitas@mh-hannover.de; tobias.holderried@ukbonn.de; eva.wagner@unimedizin-mainz.de; oliver.kriege@unimedizin-mainz.de; Katharina.Goetze@mri.tum.de; a.morgner@skc.de; Konstanze.Doehner@uniklinik-ulm.de; uwe.platzbecker@medizin.uni-leipzig.de; Vucinic@medizin.uni-leipzig.de; nael.alakel@uniklinikum-dresden.de; katja.socket@ukdd.de; william.krueger@uni-greifswald.de; stefan.krause@uk-erlangen.de; udo.holtick@uk-koeln.de; Kerstin.Schaefer-Eckart@klinikum-nuernberg.de; Josephine.Schroeder@helios-gesundheit.de; innere4@uk-halle.de; Lars.Fransecky@uksh.de; kmt-anfrage@ukw.de; med2@bernward-khs.de; charlotte.neuerburg@ukbonn.de; Sebastian.Scholl@med.uni-jena.de; c.jehn@asklepios.com; nadine.scheer-wiaczka@gk.de; jens.chemnitz@gk.de; m.haenel@skc.de; julia.unglaub@med.uni-heidelberg.de; Germing@med.uni-duesseldorf.de; Matthias.Stelljes@ukmuenster.de; Henning, Lea <Lea.Henning@uk-essen.de>

**Cc:** Rautenberg, Christina <Christina.Rautenberg@uk-essen.de>; Friedrich.Stoelzel@uniklinikum-dresden.de; JanMoritz.Middeke@uniklinikum-dresden.de

**Betreff:** AW: [Extern] - AW: CPX-351 Paper Bitte um kurzfristige Rückmeldung

Please request agreement from all authors including additions and deletions, these can be collected in the following way:

Email your co-authors with the change, and ask them to reply to your email confirming that they agree to these changes. Once you have collected these replies, please combine all of the co-authors' email responses in one document and upload this file to your submission.

Agreed!

With kind regards

Rainer Haas

**Von:** Verbeek, Mareike <Mareike.Verbeek@mri.tum.de>

**Gesendet:** Freitag, 10. September 2021 08:23

**An:** Schroeder, Thomas <Thomas.Schroeder@uk-essen.de>; 'Kobbe@med.uni-duesseldorf.de' <Kobbe@med.uni-duesseldorf.de>; Hanoun, Maher <Maher.Hanoun@uk-essen.de>; 'Germing@med.uni-duesseldorf.de' <Germing@med.uni-duesseldorf.de>; 'Haas@med.uni-duesseldorf.de' <Haas@med.uni-duesseldorf.de>; 'Matthias.Stelljes@ukmuenster.de' <Matthias.Stelljes@ukmuenster.de>; 'lauseker@ibe.med.uni-muenchen.de' <lauseker@ibe.med.uni-muenchen.de>; 'Schetelig, Johannes' <Johannes.Schetelig@uniklinikum-dresden.de>; 'martin.bornhaeuser@uniklinikum-dresden.de' <martin.bornhaeuser@uniklinikum-dresden.de>; 'Christoph.Schliemann@ukmuenster.de' <Christoph.Schliemann@ukmuenster.de>; 'tim.sauer@med.uni-heidelberg.de'

<tim.sauer@med.uni-heidelberg.de>; 'heuser.michael@mh-hannover.de'  
<heuser.michael@mh-hannover.de>; 'Döhner Hartmut' <Hartmut.Doehner@uniklinik-  
ulm.de>; 'Gaidzik Verena' <Verena.Gaidzik@uniklinik-ulm.de>; 'thol.felicitas@mh-  
hannover.de' <thol.felicitas@mh-hannover.de>; 'tobias.holderried@ukbonn.de'  
<tobias.holderried@ukbonn.de>; 'eva.wagner@unimedizin-mainz.de'  
<eva.wagner@unimedizin-mainz.de>; 'oliver.kriege@unimedizin-mainz.de'  
<oliver.kriege@unimedizin-mainz.de>; Götze, Katharina <Katharina.Goetze@mri.tum.de>;  
'a.morgner@skc.de' <a.morgner@skc.de>; 'Döhner Konstanze'  
<Konstanze.Doehner@uniklinik-ulm.de>; 'uwe.platzbecker@medizin.uni-leipzig.de'  
<uwe.platzbecker@medizin.uni-leipzig.de>; 'Vladan' <Vucinic@medizin.uni-leipzig.de>;  
'nael.alakel@uniklinikum-dresden.de' <nael.alakel@uniklinikum-dresden.de>;  
'katja.sockel@ukdd.de' <katja.sockel@ukdd.de>; 'william.krueger@uni-greifswald.de'  
<william.krueger@uni-greifswald.de>; 'stefan.krause@uk-erlangen.de' <stefan.krause@uk-  
erlangen.de>; 'udo.holtick@uk-koeln.de' <udo.holtick@uk-koeln.de>; 'Kerstin.Schaefer-  
Eckart@klinikum-nuernberg.de' <Kerstin.Schaefer-Eckart@klinikum-nuernberg.de>;  
'Josephine.Schroeder@helios-gesundheit.de' <Josephine.Schroeder@helios-gesundheit.de>;  
'innere4@uk-halle.de' <innere4@uk-halle.de>; 'Lars.Fransecky@uksh.de'  
<Lars.Fransecky@uksh.de>; 'kmt-anfrage@ukw.de' <kmt-anfrage@ukw.de>;  
'med2@bernward-khs.de' <med2@bernward-khs.de>; 'charlotte.neuerburg@ukbonn.de'  
<charlotte.neuerburg@ukbonn.de>; 'Sebastian.Scholl@med.uni-jena.de'  
<Sebastian.Scholl@med.uni-jena.de>; 'c.jehn@asklepios.com' <c.jehn@asklepios.com>;  
'nadine.scheer-wiaczka@gk.de' <nadine.scheer-wiaczka@gk.de>; 'jens.chemnitz@gk.de'  
<jens.chemnitz@gk.de>; 'm.haenel@skc.de' <m.haenel@skc.de>; 'julia.unglaub@med.uni-  
heidelberg.de' <julia.unglaub@med.uni-heidelberg.de>; 'Germing@med.uni-duesseldorf.de'  
<Germing@med.uni-duesseldorf.de>; 'Matthias.Stelljes@ukmuenster.de'  
<Matthias.Stelljes@ukmuenster.de>; Henning, Lea <Lea.Henning@uk-essen.de>  
**Cc:** Rautenberg, Christina <Christina.Rautenberg@uk-essen.de>; 'Stölzel, Friedrich'  
<Friedrich.Stoelzel@uniklinikum-dresden.de>; 'Middeke, Jan Moritz'  
<JanMoritz.Middeke@uniklinikum-dresden.de>

**Betreff:** AW: CPX-351 Paper Bitte um kurzfristige Rückmeldung

Please request agreement from all authors including additions and deletions, these can be collected in the following way:

Email your co-authors with the change, and ask them to reply to your email confirming that they agree to these changes. Once you have collected these replies, please combine all of the co-authors' email responses in one document and upload this file to your submission.

Agreed!

Best  
Mareike

**Von:** Unglaub, Julia <Julia.Unglaub@med.uni-heidelberg.de>

**Gesendet:** Freitag, 10. September 2021 08:21

**An:** Schroeder, Thomas <Thomas.Schroeder@uk-essen.de>; 'Kobbe@med.uni-  
duesseldorf.de' <Kobbe@med.uni-duesseldorf.de>; Hanoun, Maher <Maher.Hanoun@uk-  
essen.de>; 'Germing@med.uni-duesseldorf.de' <Germing@med.uni-duesseldorf.de>;  
'Haas@med.uni-duesseldorf.de' <Haas@med.uni-duesseldorf.de>;  
'Matthias.Stelljes@ukmuenster.de' <Matthias.Stelljes@ukmuenster.de>;  
'lauseker@ibe.med.uni-muenchen.de' <lauseker@ibe.med.uni-muenchen.de>; 'Schetelig,

Johannes' <Johannes.Schetelig@uniklinikum-dresden.de>;  
'martin.bornhaeuser@uniklinikum-dresden.de' <martin.bornhaeuser@uniklinikum-  
dresden.de>; 'Christoph.Schliemann@ukmuenster.de'  
<Christoph.Schliemann@ukmuenster.de>; Sauer, Tim <Tim.Sauer@med.uni-heidelberg.de>;  
'heuser.michael@mh-hannover.de' <heuser.michael@mh-hannover.de>; 'Döhner Hartmut'  
<Hartmut.Doehner@uniklinik-ulm.de>; 'Gaidzik Verena' <Verena.Gaidzik@uniklinik-  
ulm.de>; 'thol.felicitas@mh-hannover.de' <thol.felicitas@mh-hannover.de>;  
'tobias.holderried@ukbonn.de' <tobias.holderried@ukbonn.de>; 'eva.wagner@unimedizin-  
mainz.de' <eva.wagner@unimedizin-mainz.de>; 'oliver.kriege@unimedizin-mainz.de'  
<oliver.kriege@unimedizin-mainz.de>; 'katharina.goetze@mri.tum.de'  
<katharina.goetze@mri.tum.de>; 'mareike.verbeek@mri.tum.de'  
<mareike.verbeek@mri.tum.de>; 'a.morgner@skc.de' <a.morgner@skc.de>; 'Döhner  
Konstanze' <Konstanze.Doehner@uniklinik-ulm.de>; 'uwe.platzbecker@medizin.uni-  
leipzig.de' <uwe.platzbecker@medizin.uni-leipzig.de>; 'Vladan' <Vucinic@medizin.uni-  
leipzig.de>; 'nael.alakel@uniklinikum-dresden.de' <nael.alakel@uniklinikum-dresden.de>;  
'katja.sockel@ukdd.de' <katja.sockel@ukdd.de>; 'william.krueger@uni-greifswald.de'  
<william.krueger@uni-greifswald.de>; 'stefan.krause@uk-erlangen.de' <stefan.krause@uk-  
erlangen.de>; 'udo.holtick@uk-koeln.de' <udo.holtick@uk-koeln.de>; 'Kerstin.Schaefer-  
Eckart@klinikum-nuernberg.de' <Kerstin.Schaefer-Eckart@klinikum-nuernberg.de>;  
'Josephine.Schroeder@helios-gesundheit.de' <Josephine.Schroeder@helios-gesundheit.de>;  
'innere4@uk-halle.de' <innere4@uk-halle.de>; 'Lars.Fransecky@uksh.de'  
<Lars.Fransecky@uksh.de>; 'kmt-anfrage@ukw.de' <kmt-anfrage@ukw.de>;  
'med2@bernward-khs.de' <med2@bernward-khs.de>; 'charlotte.neuerburg@ukbonn.de'  
<charlotte.neuerburg@ukbonn.de>; 'Sebastian.Scholl@med.uni-jena.de'  
<Sebastian.Scholl@med.uni-jena.de>; 'c.jehn@asklepios.com' <c.jehn@asklepios.com>;  
'nadine.scheer-wiaczka@gk.de' <nadine.scheer-wiaczka@gk.de>; 'jens.chemnitz@gk.de'  
<jens.chemnitz@gk.de>; 'm.haenel@skc.de' <m.haenel@skc.de>; 'Germing@med.uni-  
duesseldorf.de' <Germing@med.uni-duesseldorf.de>; 'Matthias.Stelljes@ukmuenster.de'  
<Matthias.Stelljes@ukmuenster.de>; Henning, Lea <Lea.Henning@uk-essen.de>  
**Cc:** Rautenberg, Christina <Christina.Rautenberg@uk-essen.de>; 'Stölzel, Friedrich'  
<Friedrich.Stoelzel@uniklinikum-dresden.de>; 'Middeke, Jan Moritz'  
<JanMoritz.Middeke@uniklinikum-dresden.de>

**Betreff:** AW: CPX-351 Paper Bitte um kurzfristige Rückmeldung

Please request agreement from all authors including additions and deletions, these can be collected in the following way:

Email your co-authors with the change, and ask them to reply to your email confirming that they agree to these changes. Once you have collected these replies, please combine all of the co-authors' email responses in one document and upload this file to your submission.

Agreed!

Kind regards  
Julia Unglaub

**Von:** Kriege, Oliver <Oliver.Kriege@unimedizin-mainz.de>

**Gesendet:** Freitag, 10. September 2021 08:05

**An:** Schroeder, Thomas <Thomas.Schroeder@uk-essen.de>

**Betreff:** AW: CPX-351 Paper Bitte um kurzfristige Rückmeldung

Please request agreement from all authors including additions and deletions, these can be collected in the following way:

Email your co-authors with the change, and ask them to reply to your email confirming that they agree to these changes. Once you have collected these replies, please combine all of the co-authors' email responses in one document and upload this file to your submission.

Agreed

Lieben Gruß  
Oliver Kriege

Dr. med. O. Kriege  
Facharzt Innere Medizin, Hämatologie und Onkologie  
III. Medizinische Klinik und Poliklinik  
Hämatologie, internistische Onkologie, Pneumologie  
UCT der Universitätsmedizin Mainz

Tel: 06131-17-6322  
Fax: 06131-17-3449  
Funk: 194-6790  
Mail: [oliver.kriege@unimedizin-mainz.de](mailto:oliver.kriege@unimedizin-mainz.de)

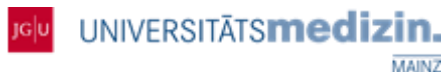

**Von:** Krause, Stefan <Stefan.Krause@uk-erlangen.de>  
**Gesendet:** Freitag, 10. September 2021 07:53  
**An:** Schroeder, Thomas <Thomas.Schroeder@uk-essen.de>  
**Betreff:** AW: CPX-351 Paper Bitte um kurzfristige Rückmeldung

Please request agreement from all authors including additions and deletions, these can be collected in the following way:

Email your co-authors with the change, and ask them to reply to your email confirming that they agree to these changes. Once you have collected these replies, please combine all of the co-authors' email responses in one document and upload this file to your submission.

agreed

Mit vielen Grüßen  
Stefan Krause

--

Prof. Dr. Stefan W. Krause, leitender Oberarzt  
Medizinische Klinik 5 - Hämatologie/Onkologie  
Universitätsklinik, Ulmenweg 18, 91054 Erlangen  
ph: 09131 85-35957 fax: 09131 85-35958

**Von:** Germing@med.uni-duesseldorf.de <Germing@med.uni-duesseldorf.de>  
**Gesendet:** Freitag, 10. September 2021 07:49  
**An:** Schroeder, Thomas <Thomas.Schroeder@uk-essen.de>; Kobbe@med.uni-duesseldorf.de; Hanoun, Maher <Maher.Hanoun@uk-essen.de>; Haas@med.uni-duesseldorf.de; Matthias.Stelljes@ukmuenster.de; lauseker@ibe.med.uni-muenchen.de; Johannes.Schetelig@uniklinikum-dresden.de; martin.bornhaeuser@uniklinikum-dresden.de; Christoph.Schliemann@ukmuenster.de; tim.sauer@med.uni-heidelberg.de;

heuser.michael@mh-hannover.de; Hartmut.Doehner@uniklinik-ulm.de;  
Verena.Gaidzik@uniklinik-ulm.de; thol.felicitas@mh-hannover.de;  
tobias.holderried@ukbonn.de; eva.wagner@unimedizin-mainz.de; oliver.kriege@unimedizin-mainz.de; katharina.goetze@mri.tum.de; mareike.verbeek@mri.tum.de; a.morgner@skc.de;  
Konstanze.Doehner@uniklinik-ulm.de; uwe.platzbecker@medizin.uni-leipzig.de;  
Vucinic@medizin.uni-leipzig.de; nael.alakel@uniklinikum-dresden.de;  
katja.sockel@ukdd.de; william.krueger@uni-greifswald.de; stefan.krause@uk-erlangen.de;  
udo.holtick@uk-koeln.de; Kerstin.Schaefer-Eckart@klinikum-nuernberg.de;  
Josephine.Schroeder@helios-gesundheit.de; innere4@uk-halle.de; Lars.Fransecky@uksh.de;  
kmt-anfrage@ukw.de; med2@bernward-khs.de; charlotte.neuerburg@ukbonn.de;  
Sebastian.Scholl@med.uni-jena.de; c.jehn@asklepios.com; nadine.scheer-wiaczka@gk.de;  
jens.chemnitz@gk.de; m.haenel@skc.de; julia.unglaub@med.uni-heidelberg.de;  
Matthias.Stelljes@ukmuenster.de; Henning, Lea <Lea.Henning@uk-essen.de>  
**Cc:** Rautenberg, Christina <Christina.Rautenberg@uk-essen.de>;  
Friedrich.Stoelzel@uniklinikum-dresden.de; JanMoritz.Middeke@uniklinikum-dresden.de  
**Betreff:** AW: [Extern] - CPX-351 Paper Bitte um kurzfristige Rückmeldung

Please request agreement from all authors including additions and deletions, these can be collected in the following way:

Email your co-authors with the change, and ask them to reply to your email confirming that they agree to these changes. Once you have collected these replies, please combine all of the co-authors' email responses in one document and upload this file to your submission.

Agreed!  
Best  
Ulrich

**Von:** Hanoun, Maher <Maher.Hanoun@uk-essen.de>  
**Gesendet:** Freitag, 10. September 2021 07:06  
**An:** Schroeder, Thomas <Thomas.Schroeder@uk-essen.de>  
**Betreff:** AW: CPX-351 Paper Bitte um kurzfristige Rückmeldung

Please request agreement from all authors including additions and deletions, these can be collected in the following way:

Email your co-authors with the change, and ask them to reply to your email confirming that they agree to these changes. Once you have collected these replies, please combine all of the co-authors' email responses in one document and upload this file to your submission.

Agreed!

**Von:** Matthias.Stelljes@ukmuenster.de <Matthias.Stelljes@ukmuenster.de>  
**Gesendet:** Donnerstag, 9. September 2021 20:30  
**An:** Schroeder, Thomas <Thomas.Schroeder@uk-essen.de>  
**Betreff:** Re: CPX-351 Paper Bitte um kurzfristige Rückmeldung

Please request agreement from all authors including additions and deletions, these can be collected in the following way:

Email your co-authors with the change, and ask them to reply to your email confirming that they agree to these changes. Once you have collected these replies, please combine all of the co-authors' email responses in one document and upload this file to your submission.

Agreed

Mit freundlichen Grüßen

M. Stelljes

Von meinem Mobilgerät gesendet

**Von:** Vucinic, Vladan <Vladan.Vucinic@medizin.uni-leipzig.de>

**Gesendet:** Donnerstag, 9. September 2021 20:34

**An:** Schroeder, Thomas <Thomas.Schroeder@uk-essen.de>

**Cc:** Rautenberg, Christina <Christina.Rautenberg@uk-essen.de>

**Betreff:** AW: CPX-351 Paper Bitte um kurzfristige Rückmeldung

Lieber Herr Schroeder,

in der Sammel E-mail gab es tatsächlich ein Fehler bezogen auf meine E-mail Adresse.  
Selbstverständlich bin ich einverstanden.

Dear all,

of course I agree.

Please request agreement from all authors including additions and deletions, these can be collected in the following way:

Email your co-authors with the change, and ask them to reply to your email confirming that they agree to these changes. Once you have collected these replies, please combine all of the co-authors' email responses in one document and upload this file to your submission.

Best,

Vladan Vucinic

**Von:** Christoph.Schliemann@ukmuenster.de <Christoph.Schliemann@ukmuenster.de>

**Gesendet:** Donnerstag, 9. September 2021 20:35

**An:** Schroeder, Thomas <Thomas.Schroeder@uk-essen.de>

**Betreff:** Re: CPX-351 Paper Bitte um kurzfristige Rückmeldung

Please request agreement from all authors including additions and deletions, these can be collected in the following way:

Email your co-authors with the change, and ask them to reply to your email confirming that they agree to these changes. Once you have collected these replies, please combine all of the co-authors' email responses in one document and upload this file to your submission.

I agree

Best,

Christoph Schliemann



**Von:** Tobias.Holderried@ukbonn.de <Tobias.Holderried@ukbonn.de>  
**Gesendet:** Donnerstag, 9. September 2021 20:50  
**An:** Schroeder, Thomas <Thomas.Schroeder@uk-essen.de>  
**Betreff:** Re: CPX-351 Paper Bitte um kurzfristige Rückmeldung

Agreed.

Please request agreement from all authors including additions and deletions, these can be collected in the following way:  
Email your co-authors with the change, and ask them to reply to your email confirming that they agree to these changes. Once you have collected these replies, please combine all of the co-authors' email responses in one document and upload this file to your submission.

**Von:** Stölzel, Friedrich <Friedrich.Stoelzel@uniklinikum-dresden.de>  
**Gesendet:** Donnerstag, 9. September 2021 21:01  
**An:** Schroeder, Thomas <Thomas.Schroeder@uk-essen.de>  
**Betreff:** AW: CPX-351 Paper Bitte um kurzfristige Rückmeldung

Please request agreement from all authors including additions and deletions, these can be collected in the following way:  
Email your co-authors with the change, and ask them to reply to your email confirming that they agree to these changes. Once you have collected these replies, please combine all of the co-authors' email responses in one document and upload this file to your submission.

Agreed,  
Friedrich Stölzel

**Von:** Verena.Gaidzik@uniklinik-ulm.de <Verena.Gaidzik@uniklinik-ulm.de>  
**Gesendet:** Donnerstag, 9. September 2021 21:04  
**An:** Schroeder, Thomas <Thomas.Schroeder@uk-essen.de>  
**Betreff:** AW: CPX-351 Paper Bitte um kurzfristige Rückmeldung

Please request agreement from all authors including additions and deletions, these can be collected in the following way:  
Email your co-authors with the change, and ask them to reply to your email confirming that they agree to these changes. Once you have collected these replies, please combine all of the co-authors' email responses in one document and upload this file to your submission.

Lieber Herr Schroeder,

agreed!

Herzlichen Glückwunsch und vielen Dank für die Berücksichtigung als Koautorin.  
Viele Grüße,  
Verena Gaidzik

**Von:** Chemnitz, Jens <jens.chemnitz@gk.de>  
**Gesendet:** Donnerstag, 9. September 2021 22:02  
**An:** Schroeder, Thomas <Thomas.Schroeder@uk-essen.de>  
**Betreff:** AW: CPX-351 Paper Bitte um kurzfristige Rückmeldung



Agreed

Please request agreement from all authors including additions and deletions, these can be collected in the following way:

Email your co-authors with the change, and ask them to reply to your email confirming that they agree to these changes. Once you have collected these replies, please combine all of the co-authors' email responses in one document and upload this file to your submission.

Jens Chemnitz

**Von:** Udo Holtick <udo.holtick@uk-koeln.de>  
**Gesendet:** Donnerstag, 9. September 2021 21:06  
**An:** Schroeder, Thomas <Thomas.Schroeder@uk-essen.de>  
**Betreff:** RE: CPX-351 Paper Bitte um kurzfristige Rückmeldung  
**Priorität:** Hoch

Agreed.  
Kind regards,  
Udo

Please request agreement from all authors including additions and deletions, these can be collected in the following way:

Email your co-authors with the change, and ask them to reply to your email confirming that they agree to these changes. Once you have collected these replies, please combine all of the co-authors' email responses in one document and upload this file to your submission.

**Von:** Götze, Katharina <katharina.goetze@tum.de>  
**Gesendet:** Donnerstag, 9. September 2021 21:33  
**An:** Schroeder, Thomas <Thomas.Schroeder@uk-essen.de>  
**Betreff:** Re: CPX-351 Paper Bitte um kurzfristige Rückmeldung

Please request agreement from all authors including additions and deletions, these can be collected in the following way:

Email your co-authors with the change, and ask them to reply to your email confirming that they agree to these changes. Once you have collected these replies, please combine all of the co-authors' email responses in one document and upload this file to your submission.

agreed!

Sent from my iPhone

**Von:** Wass, Maxi <maxi.wass@uk-halle.de>  
**Gesendet:** Donnerstag, 9. September 2021 23:02  
**An:** Schroeder, Thomas <Thomas.Schroeder@uk-essen.de>  
**Betreff:** AW: CPX-351 Paper Bitte um kurzfristige Rückmeldung

Agreed

Please request agreement from all authors including additions and deletions, these can be collected in the following way:

Email your co-authors with the change, and ask them to reply to your email confirming that they agree to these changes. Once you have collected these replies, please combine all of the co-authors' email responses in one document and upload this file to your submission.

Maxi Wass

**Von:** Heuser.Michael@mh-hannover.de <Heuser.Michael@mh-hannover.de>

**Gesendet:** Donnerstag, 9. September 2021 21:39

**An:** Schroeder, Thomas <Thomas.Schroeder@uk-essen.de>

**Betreff:** AW: CPX-351 Paper Bitte um kurzfristige Rückmeldung

Please request agreement from all authors including additions and deletions, these can be collected in the following way:

Email your co-authors with the change, and ask them to reply to your email confirming that they agree to these changes. Once you have collected these replies, please combine all of the co-authors' email responses in one document and upload this file to your submission.

Dear Thomas,

I agree.

Kind regards,

Michael

**Von:** Koch, Katrin <Katrin.Koch@mri.tum.de>

**Gesendet:** Donnerstag, 9. September 2021 21:47

**An:** Schroeder, Thomas <Thomas.Schroeder@uk-essen.de>

**Cc:** Götze, Katharina TUM <katharina.goetze@tum.de>

**Betreff:** AW: CPX-351 Paper Bitte um kurzfristige Rückmeldung

Agreed

Please request agreement from all authors including additions and deletions, these can be collected in the following way:

Email your co-authors with the change, and ask them to reply to your email confirming that they agree to these changes. Once you have collected these replies, please combine all of the co-authors' email responses in one document and upload this file to your submission.

Lieber Herr Schroeder,

Vielen herzlichen Dank für die Ergänzung!

Viele Grüße  
Katrin Koch

Klinikum rechts der Isar

Technische Universität München  
III. Medizinische Klinik und Poliklinik  
Ismaninger Str. 22  
81675 München

Email: [katrin.koch@mri.tum.de](mailto:katrin.koch@mri.tum.de)

**Von:** Sockel, Katja <Katja.Sockel@uniklinikum-dresden.de>  
**Gesendet:** Donnerstag, 9. September 2021 22:07  
**An:** Schroeder, Thomas <Thomas.Schroeder@uk-essen.de>  
**Betreff:** AW: CPX-351 Paper Bitte um kurzfristige Rückmeldung

agreed, of course.

Please request agreement from all authors including additions and deletions, these can be collected in the following way:  
Email your co-authors with the change, and ask them to reply to your email confirming that they agree to these changes. Once you have collected these replies, please combine all of the co-authors' email responses in one document and upload this file to your submission.

Dr.med.Katja Sockel

Funktionsoberärztin

Fachärztin für Innere Medizin/Hämatologie/Onkologie

Medizinische Klinik und Poliklinik I  
Tel. +49 (0)351 458-15627

Fax. +49 (0)351 458-4373

Universitätsklinikum Carl Gustav Carus  
an der Technischen Universität Dresden  
Anstalt des öffentlichen Rechts des Freistaates Sachsen  
Fetscherstraße 74, 01307 Dresden  
<http://www.uniklinikum-dresden.de><<http://www.uniklinikum-dresden.de/>

**Von:** Middeke, Jan Moritz <JanMoritz.Middeke@uniklinikum-dresden.de>  
**Gesendet:** Donnerstag, 9. September 2021 22:24  
**An:** Schroeder, Thomas <Thomas.Schroeder@uk-essen.de>  
**Betreff:** AW: CPX-351 Paper Bitte um kurzfristige Rückmeldung

Please request agreement from all authors including additions and deletions, these can be collected in the following way:  
Email your co-authors with the change, and ask them to reply to your email confirming that they agree to these changes. Once you have collected these replies, please combine all of the co-authors' email responses in one document and upload this file to your submission.

**Agreed**

**Von:** Hänel, Mathias ChA Priv.-Doz. Dr. med. <m.haenel@skc.de>  
**Gesendet:** Freitag, 10. September 2021 06:12

**An:** Schroeder, Thomas <Thomas.Schroeder@uk-essen.de>

**Betreff:** AW: CPX-351 Paper Bitte um kurzfristige Rückmeldung

Please request agreement from all authors including additions and deletions, these can be collected in the following way:

Email your co-authors with the change, and ask them to reply to your email confirming that they agree to these changes. Once you have collected these replies, please combine all of the co-authors' email responses in one document and upload this file to your submission.

Agreed.

**Von:** Bornhäuser, Martin <Martin.Bornhaeuser@uniklinikum-dresden.de>

**Gesendet:** Freitag, 10. September 2021 00:44

**An:** Schroeder, Thomas <Thomas.Schroeder@uk-essen.de>

**Betreff:** Re: CPX-351 Paper Bitte um kurzfristige Rückmeldung

Please request agreement from all authors including additions and deletions, these can be collected in the following way:

Email your co-authors with the change, and ask them to reply to your email confirming that they agree to these changes. Once you have collected these replies, please combine all of the co-authors' email responses in one document and upload this file to your submission.

Agreed

**Von:** Röllig, Christoph <Christoph.Roellig@uniklinikum-dresden.de>

**Gesendet:** Donnerstag, 16. September 2021 07:34

**An:** Schroeder, Thomas <Thomas.Schroeder@uk-essen.de>

**Betreff:** AW: CPX-351 Paper Bitte um kurzfristige Rückmeldung

Please request agreement from all authors including additions and deletions, these can be collected in the following way:

Email your co-authors with the change, and ask them to reply to your email confirming that they agree to these changes. Once you have collected these replies, please combine all of the co-authors' email responses in one document and upload this file to your submission.

Agreed

Christoph Röllig

**Von:** Rautenberg, Christina <Christina.Rautenberg@uk-essen.de>

**Gesendet:** Donnerstag, 16. September 2021 07:38

**An:** Schroeder, Thomas <Thomas.Schroeder@uk-essen.de>

**Betreff:** AW: CPX-351 Paper Bitte um kurzfristige Rückmeldung

Agreed.

Christina Rautenberg

Please request agreement from all authors including additions and deletions, these can be collected in the following way:

Email your co-authors with the change, and ask them to reply to your email confirming that they agree to these changes. Once you have collected these replies, please combine all of the co-authors' email responses in one document and upload this file to your submission.

**Von:** Röhnert, Maximilian-Alexander <Maximilian-Alexander.Roehnert@uniklinikum-dresden.de>  
**Gesendet:** Donnerstag, 16. September 2021 08:41  
**An:** Schroeder, Thomas <Thomas.Schroeder@uk-essen.de>  
**Betreff:** AW: CPX-351 Paper Bitte um kurzfristige Rückmeldung

Sehr geehrter Herr PD Dr. med. Schröder,

leider war meine E-Mail-Adresse nicht ganz korrekt, so dass ich erst nach Weiterleitung der E-Mail durch Friedrich Stölzle antworten kann:

Agreed - Maximilian Alexander Röhnert

Please request agreement from all authors including additions and deletions, these can be collected in the following way:  
Email your co-authors with the change, and ask them to reply to your email confirming that they agree to these changes. Once you have collected these replies, please combine all of the co-authors' email responses in one document and upload this file to your submission.

Vielen Dank und viele Grüße

Max Röhnert

**Von:** Faltin, Josephine <Josephine.Faltin@helios-gesundheit.de>  
**Gesendet:** Donnerstag, 16. September 2021 08:14  
**An:** Schroeder, Thomas <Thomas.Schroeder@uk-essen.de>  
**Betreff:** AW: CPX-351 Paper Bitte um kurzfristige Rückmeldung

**Agreed**

-----Ursprüngliche Nachricht-----

Von: Kraus, Sabrina <Kraus\_S3@ukw.de>  
Gesendet: Donnerstag, 16. September 2021 07:56  
An: Schroeder, Thomas <Thomas.Schroeder@uk-essen.de>  
Betreff: AW: [Ext] AW: CPX-351 Paper Bitte um kurzfristige Rückmeldung

Lieber Herr Schroeder,

herby I agree to these changes.

Please request agreement from all authors including additions and deletions, these can be collected in the following way:  
Email your co-authors with the change, and ask them to reply to your email confirming that they agree to these changes. Once you have collected these replies, please combine all of the co-authors' email responses in one document and upload this file to your submission.

Best,

Sabrina Kraus

**Von:** Schaefer-Eckart, Kerstin Dr. <Kerstin.Schaefer-Eckart@klinikum-nuernberg.de>

**Gesendet:** Donnerstag, 16. September 2021 07:44

**An:** Schroeder, Thomas <Thomas.Schroeder@uk-essen.de>

**Betreff:** AW: CPX-351 Paper Bitte um kurzfristige Rückmeldung

Please request agreement from all authors including additions and deletions, these can be collected in the following way:

Email your co-authors with the change, and ask them to reply to your email confirming that they agree to these changes. Once you have collected these replies, please combine all of the co-authors' email responses in one document and upload this file to your submission.

Habe ich zwar schon ,aber ich mache es sicherheitshalber nochmal: agreed

Dr. K. Schäfer-Eckart

Leitende Oberärztin

Einheit für Knochenmarktransplantation

Klinik für Innere Medizin 5

Schwerpunkt Onkologie/Hämatologie

Universitätsklinik der Paracelsus Medizinischen Privatuniversität

Prof.-Ernst-Nathan-Str. 1, 90419 Nürnberg

T: +49 911 398-3650

F: +49 911 398-3657

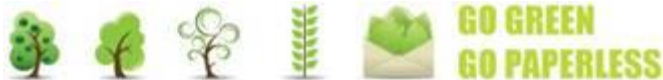

Supplement: 41408_2021_558_MOESM3_ESM.pdf [file 41408_2021_558_MOESM3_ESM.pdf]
